# Supplementary material for: Whole-Genome Sequencing for the Investigation of a Hospital Outbreak of MRSA in China
Source: PubMed Central journal article supplement (PMC4780730; doi:10.1371/journal.pone.0149844), 2016-03-07
Supplement: pone.0149844.s002.pdf [file pone.0149844.s002.pdf]

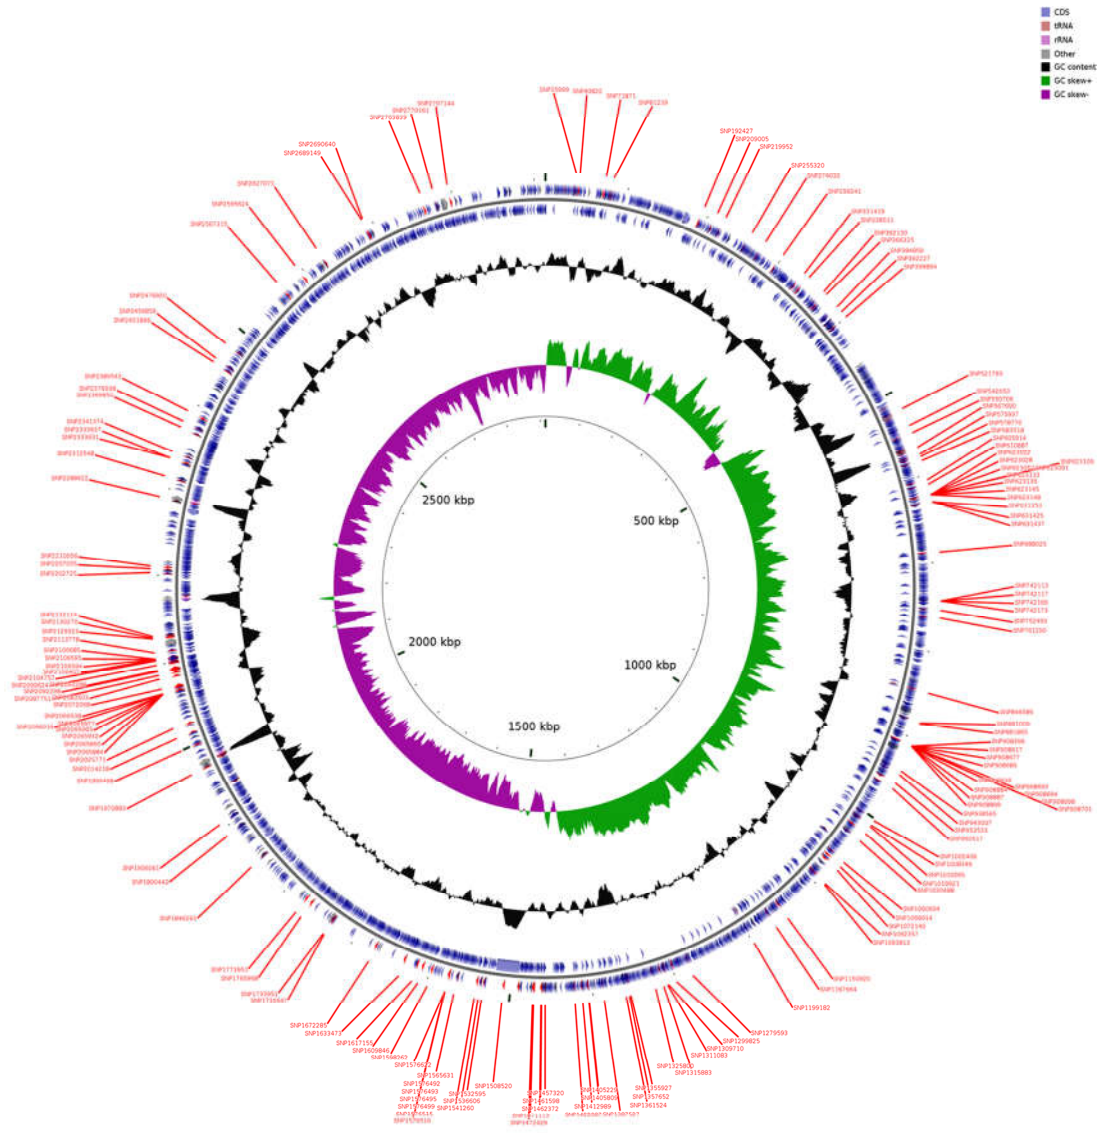

*Staphylococcus aureus* subsp. *aureus* T0131

**S2 Fig SNP distribution of SA13005 in the whole genome by using cgview mapping software.**
